# Supplementary material
Source: publisher site journal article supplement (https://www.dovepress.com/article/456295)
Supplement: Supplementary file 1 [file get_supplementary_file.php]

**Supplementary Material**

**Supplementary Table 1** How to measure covariates

| **Variables** | |
| --- | --- |
| **Maternal age** | |
|  | Calculated from the date of entry on the questionnaire and the date of birth on the consent form. |
| **Pre-pregnancy maternal body mass index** | |
|  | Calculated from the height and weight in the medical record transcriptions. |
| **Marital status** | |
|  | Q: "Current marital status?" |
|  | A: 1=Married (including common-law marriage), 2=Single (Never married), 3=Divorced, 4=Widowed |
| **Education status** | |
|  | Q: "Highest level of education?" |
|  | A: 1=Junior high school, 2=High school, 3=Technical junior college, 4=Technical/vocational college, 5=Associate’s degree, 6=Bachelor’s degree, 7=Graduate degree (Master’s/Doctoral) |
| **Employment status** | |
|  | Q: "Current employment status?" |
|  | A: 1=Permanent full-time employee, 2=Self-employed, 3=Temporary full-time employee, 4=Full-time homemaker or leave of absence, 5=Part-time employee, 6=Unemployed, 7=Other |
| **Household income level** | |
|  | Q: "Annual household income?" |
|  | A: 1=Less than 2 million yen, 2= 2 million yen to less than 4 million yen, 3=4 million yen to less than 6 million yen, 4=6 million yen to less than 8 million yen, 5=8 million yen to less than 10 million yen, 6=10 million yen to less than 12 million yen, 7=12 million yen to less than 15 million yen, 8=15 million yen to less than 20 million yen, 9=20 million yen or over |
| **Smoking status** | |
|  | Q: "Smoking history?" |
|  | A: 1=Never, 2=Previously did, but quit before learning of current pregnancy, 3=Previously did, but quit after learning of current pregnancy, 4=Yes, I still smoke |
| **Drinking status** | |
|  | Q: "Alcohol intake?" |
|  | A: 1=Never, 2=Previously did, but quit before learning of current pregnancy, 3=Previously did, but quit after learning of current pregnancy, 4=Yes, I still drink |
| **Recent experience of stressful life events** | |
|  | Q: "Experience in any of the following stressful events during the past year (Death of a parent, Death of a spouse, Death of a child, Illness of a parent, Illness/injury of a spouse, Illness/injury of a child, Spouse’s dismissal from employment, Dismissal from employment, Death of a close friend, Taking on a major mortgage, Change in family structure (e.g., started co-habiting with grandparents), Divorce, Moving house, Having marital problems, Other stressful event)" |
|  | A: 1=No, 2=Yes |
| **Experience of verbal abuse and/or domestic violence from partner** | |
|  | Q: "Frequency of being insulted or cursed at by husband/romantic partner during current pregnancy" |
|  | A: "1=Never, 2=Seldom, 3­=Sometimes, 4=Often" |
|  | Q: "Frequency of being hit or beaten up by husband/romantic partner in the course of quarrel, which led to injury, during current pregnancy" |
|  | A: "1=Never, 2=Seldom, 3­=Sometimes, 4=Often" |
| **Physician-diagnosed history of major psychiatric diseases** | |
|  | Q: "Neurological/mental diseases (depression)" |
|  | Q: "Neurological/mental diseases (dysautonomia)" |
|  | Q: "Neurological/mental diseases (anxiety disorder (including anxiety neurosis, specific phobia, panic disorder, social phobia and obsessive-compulsive disorder))" |
|  | Q: "Neurological/mental diseases (schizophrenia)" |
|  | A: 0=No 1=Yes |
| **Physician-diagnosed history of any physical diseases** | |
|  | Q: "Disease of heart, brain, and blood vessels" |
|  | Q: "Allergy and disease of the ear, nose, and throat" |
|  | Q: "Disease of collagen and immunity" |
|  | Q: "Disease of endocrine system" |
|  | Q: "Disease of digestive organs, liver, and pancreas" |
|  | Q: "Disease of kidney" |
|  | Q: "Obstetric/gynecologic disease" |
|  | Q: "Ophthalmologic diseases" |
|  | Q: "Disease of bone and muscle" |
|  | Q: "Cancer" |
|  | Q: "Developmental disorder" |
|  | Q: "Abnormality of pregnancy and childbirth" |
|  | A: 0=No 1=Yes |
| **Parity** |  |
|  | Derived from the medical record transcriptions |
| **Negative attitude toward pregnancy** | |
|  | Q: "Feeling when learning of pregnancy" |
|  | A: 1=Very happy, 2=Suprised but happy, 3=Suprised and confused, 4=Upset, 5=Did not have any specific feeling, 6=Other feeling |
| **Maternal psychological distress** | |
|  | Measured using the Japanese version of the Kessler Psychological Distress Scale (K6). See text for more details. |
| **Living with partner** | |
|  | Q: "Living with husband/romantic partner" |
|  | A: 0=No 1=Yes |
| **Living with parent(s)** | |
|  | Q: "Living with father" |
|  | A: 0=No 1=Yes |
|  | Q: "Living with mother" |
|  | A: 0=No 1=Yes |
| **Living with parent(s)-in-law** | |
|  | Q: "living with father-in -law" |
|  | A: 0=No 1=Yes |
|  | Q: "Living with mother-in-law" |
|  | A: 0=No 1=Yes |
| **Pet ownership** | |
|  | Q: "Having a pet currently, cat" |
|  | A: 0=No, 1=Yes |
|  | Q: "Having a pet currently, dog" |
|  | A: 0=No, 1=Yes |
| **Area of residence** | |
|  | Derived from the consent form |

Q: question, A = answer

**Supplementary Table 2** Descriptive characteristics according to neighborhood trust (n = 81,663)

|  | Neighborhood trust | | | |  |  |  |  |  |  |  |
| --- | --- | --- | --- | --- | --- | --- | --- | --- | --- | --- | --- |
|  | High |  |  | Relatively high | |  | Relatively low | |  | Low |  |
| Variables | N | % |  | N | % |  | N | % |  | N | % |
| **Maternal age (years old)b** |  |  |  |  |  |  |  |  |  |  |  |
| ≤ 25 | 687 | 9.96 |  | 4,026 | 10.56 |  | 2,829 | 14.04 |  | 3,287 | 19.92 |
| > 25–≤ 35 | 4,529 | 65.67 |  | 25,444 | 66.76 |  | 13,494 | 66.95 |  | 10,765 | 65.24 |
| > 35 | 1,681 | 24.37 |  | 8,642 | 22.68 |  | 3,831 | 19.01 |  | 2,448 | 14.84 |
| **Pre-pregnancy maternal body mass index (kg/m2)a** | | | | |  |  |  |  |  |  |  |
| < 18.5 | 1,071 | 15.53 |  | 6,001 | 15.75 |  | 3,281 | 16.28 |  | 2,802 | 16.98 |
| 18.5–< 25 | 5,162 | 74.84 |  | 28,237 | 74.09 |  | 14,721 | 73.04 |  | 12,015 | 72.82 |
| ≥ 25 | 662 | 9.60 |  | 3,861 | 10.13 |  | 2,139 | 10.61 |  | 1,670 | 10.12 |
| Missing value | 2 | 0.03 |  | 13 | 0.03 |  | 13 | 0.06 |  | 13 | 0.08 |
| **Marital statusa** |  |  |  |  |  |  |  |  |  |  |  |
| Married | 6,648 | 96.39 |  | 36,625 | 96.10 |  | 19,147 | 95.00 |  | 15,234 | 92.33 |
| Non-married | 207 | 3.00 |  | 1,235 | 3.24 |  | 865 | 4.29 |  | 1,086 | 6.58 |
| Missing value | 42 | 0.61 |  | 252 | 0.66 |  | 142 | 0.70 |  | 180 | 1.09 |
| **Education status (years)b** |  |  |  |  |  |  |  |  |  |  |  |
| ≤ 12 (ie, high school graduate) | 2,185 | 31.68 |  | 12,139 | 31.85 |  | 7,325 | 36.35 |  | 6,609 | 40.05 |
| > 12–< 16 | 3,033 | 43.98 |  | 16,647 | 43.68 |  | 8,459 | 41.97 |  | 6,676 | 40.46 |
| ≥ 16 (ie, undergraduate or graduate) | 1,662 | 24.10 |  | 9,224 | 24.20 |  | 4,316 | 21.42 |  | 3,162 | 19.16 |
| Missing value | 17 | 0.25 |  | 102 | 0.27 |  | 54 | 0.27 |  | 53 | 0.32 |
| **Employment statusb** |  |  |  |  |  |  |  |  |  |  |  |
| Employed | 3,503 | 50.79 |  | 20,372 | 53.45 |  | 11,194 | 55.54 |  | 9,229 | 55.93 |
| Unemployed | 3,348 | 48.54 |  | 17,520 | 45.97 |  | 8,805 | 43.69 |  | 7,136 | 43.25 |
| Missing value | 46 | 0.67 |  | 220 | 0.58 |  | 155 | 0.77 |  | 135 | 0.82 |
| **Household income level (million JPY/year)b** | | | | |  |  |  |  |  |  |  |
| < 4 | 2,337 | 33.88 |  | 13,158 | 34.52 |  | 7,704 | 38.23 |  | 6,838 | 41.44 |
| 4–< 6 | 2,224 | 32.25 |  | 12,279 | 32.22 |  | 6,212 | 30.82 |  | 4,843 | 29.35 |
| ≥ 6 | 1,864 | 27.03 |  | 10,301 | 27.03 |  | 5,023 | 24.92 |  | 3,803 | 23.05 |
| Missing value | 472 | 6.84 |  | 2,374 | 6.23 |  | 1,215 | 6.03 |  | 1,016 | 6.16 |
| **Smoking statusb** |  |  |  |  |  |  |  |  |  |  |  |
| Yes | 200 | 2.90 |  | 1,200 | 3.15 |  | 858 | 4.26 |  | 948 | 5.75 |
| No | 6,643 | 96.32 |  | 36,667 | 96.21 |  | 19,157 | 95.05 |  | 15,415 | 93.42 |
| Missing value | 54 | 0.78 |  | 245 | 0.64 |  | 139 | 0.69 |  | 137 | 0.83 |
| **Drinking statusb** |  |  |  |  |  |  |  |  |  |  |  |
| Yes | 216 | 3.13 |  | 1,086 | 2.85 |  | 526 | 2.61 |  | 404 | 2.45 |
| No | 6,634 | 96.19 |  | 36,763 | 96.46 |  | 19,486 | 96.69 |  | 15,964 | 96.75 |
| Missing value | 47 | 0.68 |  | 263 | 0.69 |  | 142 | 0.70 |  | 132 | 0.80 |
| **Recent experience of stressful life eventsb** | | | |  |  |  |  |  |  |  |  |
| Yes | 2,568 | 37.23 |  | 16,086 | 42.21 |  | 8,935 | 44.33 |  | 7,684 | 46.57 |
| No | 4,286 | 62.14 |  | 21,791 | 57.18 |  | 11,079 | 54.97 |  | 8,712 | 52.80 |
| Missing value | 43 | 0.62 |  | 235 | 0.62 |  | 140 | 0.69 |  | 104 | 0.63 |
| **Experience of verbal abuse and/or domestic violence from partnerb** | | | | | | | |  |  |  |  |
| Yes | 682 | 9.89 |  | 4,465 | 11.72 |  | 2,995 | 14.86 |  | 2,758 | 16.72 |
| No | 6,190 | 89.75 |  | 33,517 | 87.94 |  | 17,089 | 84.79 |  | 13,668 | 82.84 |
| Missing value | 25 | 0.36 |  | 130 | 0.34 |  | 70 | 0.35 |  | 74 | 0.45 |
| **Physician-diagnosed history of major psychiatric diseasesa** | | | | | | | |  |  |  |  |
| Yes | 284 | 4.12 |  | 1,696 | 4.45 |  | 1,046 | 5.19 |  | 1,068 | 6.47 |
| No | 6,596 | 95.64 |  | 36,275 | 95.18 |  | 19,037 | 94.46 |  | 15,353 | 93.05 |
| Missing value | 17 | 0.25 |  | 141 | 0.37 |  | 71 | 0.35 |  | 79 | 0.48 |
| **Physician-diagnosed history of any physical diseasesa** | | | | | |  |  |  |  |  |  |
| Yes | 5,546 | 80.41 |  | 31,616 | 82.96 |  | 16,685 | 82.79 |  | 13,647 | 82.71 |
| No | 1,334 | 19.34 |  | 6,355 | 16.67 |  | 3,398 | 16.86 |  | 2,774 | 16.81 |
| Missing value | 17 | 0.25 |  | 141 | 0.37 |  | 71 | 0.35 |  | 79 | 0.48 |
| **Paritya** |  |  |  |  |  |  |  |  |  |  |  |
| Primiparous | 1,933 | 28.03 |  | 13,576 | 35.62 |  | 9,382 | 46.55 |  | 9,416 | 57.07 |
| Multiparous | 4,872 | 70.64 |  | 23,716 | 62.23 |  | 10,214 | 50.68 |  | 6,509 | 39.45 |
| Missing value | 92 | 1.33 |  | 820 | 2.15 |  | 558 | 2.77 |  | 575 | 3.48 |
| **Negative attitude toward pregnancya** | | |  |  |  |  |  |  |  |  |  |
| Yes | 429 | 6.22 |  | 2,509 | 6.58 |  | 1,486 | 7.37 |  | 1,356 | 8.22 |
| No | 6,429 | 93.21 |  | 35,333 | 92.71 |  | 18,525 | 91.92 |  | 15,001 | 90.92 |
| Missing value | 39 | 0.57 |  | 270 | 0.71 |  | 143 | 0.71 |  | 143 | 0.87 |
| **Maternal psychological distress (K6 score ≥ 13)a** | | | | |  |  |  |  |  |  |  |
| Yes | 149 | 2.16 |  | 920 | 2.41 |  | 711 | 3.53 |  | 905 | 5.48 |
| No | 6,719 | 97.42 |  | 36,970 | 97.00 |  | 19,324 | 95.88 |  | 15,464 | 93.72 |
| Missing value | 29 | 0.42 |  | 222 | 0.58 |  | 119 | 0.59 |  | 131 | 0.79 |
| **Living with partnera** |  |  |  |  |  |  |  |  |  |  |  |
| Yes | 6,417 | 93.04 |  | 35,521 | 93.20 |  | 18,699 | 92.78 |  | 14,968 | 90.72 |
| No | 463 | 6.71 |  | 2,450 | 6.43 |  | 1,384 | 6.87 |  | 1,453 | 8.81 |
| Missing value | 17 | 0.25 |  | 141 | 0.37 |  | 71 | 0.35 |  | 79 | 0.48 |
| **Living with parent(s)a** |  |  |  |  |  |  |  |  |  |  |  |
| Yes | 930 | 13.48 |  | 4,157 | 10.91 |  | 1,935 | 9.60 |  | 1,377 | 8.35 |
| No | 5,950 | 86.27 |  | 33,814 | 88.72 |  | 18,148 | 90.05 |  | 15,044 | 91.18 |
| Missing value | 17 | 0.25 |  | 141 | 0.37 |  | 71 | 0.35 |  | 79 | 0.48 |
| **Living with parent(s)-in-lawa** | |  |  |  |  |  |  |  |  |  |  |
| Yes | 1,087 | 15.76 |  | 5,401 | 14.17 |  | 1,969 | 9.77 |  | 1,035 | 6.27 |
| No | 5,793 | 83.99 |  | 32,570 | 85.46 |  | 18,114 | 89.88 |  | 15,386 | 93.25 |
| Missing value | 17 | 0.25 |  | 141 | 0.37 |  | 71 | 0.35 |  | 79 | 0.48 |
| **Pet ownershipb** |  |  |  |  |  |  |  |  |  |  |  |
| None | 5,488 | 79.57 |  | 30,767 | 80.73 |  | 16,606 | 82.40 |  | 13,927 | 84.41 |
| Dog(s) only | 896 | 12.99 |  | 4,594 | 12.05 |  | 2,197 | 10.90 |  | 1,566 | 9.49 |
| Cat(s) only | 360 | 5.22 |  | 2,051 | 5.38 |  | 1,001 | 4.97 |  | 814 | 4.93 |
| Both dog(s) and cat(s) | 153 | 2.22 |  | 700 | 1.84 |  | 350 | 1.74 |  | 193 | 1.17 |
| **Area of residencea** |  |  |  |  |  |  |  |  |  |  |  |
| A | 416 | 6.03 |  | 2,751 | 7.22 |  | 1,695 | 8.41 |  | 1,669 | 10.12 |
| B | 586 | 8.50 |  | 3,547 | 9.31 |  | 1,669 | 8.28 |  | 1,169 | 7.08 |
| C | 835 | 12.11 |  | 4,995 | 13.11 |  | 2,739 | 13.59 |  | 2,244 | 13.60 |
| D | 444 | 6.44 |  | 2,209 | 5.80 |  | 1,127 | 5.59 |  | 859 | 5.21 |
| E | 508 | 7.37 |  | 2,572 | 6.75 |  | 1,306 | 6.48 |  | 977 | 5.92 |
| F | 529 | 7.67 |  | 2,968 | 7.79 |  | 1,294 | 6.42 |  | 1,016 | 6.16 |
| G | 354 | 5.13 |  | 2,184 | 5.73 |  | 1,168 | 5.80 |  | 891 | 5.40 |
| H | 293 | 4.25 |  | 1,968 | 5.16 |  | 1,195 | 5.93 |  | 966 | 5.85 |
| I | 359 | 5.21 |  | 1,666 | 4.37 |  | 671 | 3.33 |  | 495 | 3.00 |
| J | 576 | 8.35 |  | 2,835 | 7.44 |  | 1,624 | 8.06 |  | 1,345 | 8.15 |
| K | 300 | 4.35 |  | 1,746 | 4.58 |  | 1,079 | 5.35 |  | 1,026 | 6.22 |
| L | 175 | 2.54 |  | 1,141 | 2.99 |  | 624 | 3.10 |  | 517 | 3.13 |
| M | 465 | 6.74 |  | 2,574 | 6.75 |  | 1,331 | 6.60 |  | 1,170 | 7.09 |
| N | 524 | 7.60 |  | 2,614 | 6.86 |  | 1,554 | 7.71 |  | 1,482 | 8.98 |
| O | 533 | 7.73 |  | 2,342 | 6.15 |  | 1,078 | 5.35 |  | 674 | 4.08 |

**Notes:** aMeasured during early pregnancy (mean ± S.D., 16.7 ± 7.6 weeks of gestation)

bMeasured during mid-late pregnancy (mean ± S.D., 28.2 ± 6.4 weeks of gestation)

**Abbreviations:** K6: Kessler Psychological Distress Scale; JPY, Japanese Yen

**Supplementary Table 3** Descriptive characteristics according to neighborhood reciprocity (n = 81,663)

|  | Neighborhood reciprocity | | | |  |  |  |  |  |  |  |
| --- | --- | --- | --- | --- | --- | --- | --- | --- | --- | --- | --- |
|  | High |  |  | Relatively high | |  | Relatively low | |  | Low |  |
| Variables | N | % |  | N | % |  | N | % |  | N | % |
| **Maternal age (years old)b** |  |  |  |  |  |  |  |  |  |  |  |
| ≤ 25 | 869 | 11.01 |  | 4,063 | 10.80 |  | 2,725 | 13.52 |  | 3,172 | 19.81 |
| > 25–≤ 35 | 5,223 | 66.16 |  | 24,946 | 66.34 |  | 13,547 | 67.23 |  | 10,516 | 65.66 |
| > 35 | 1,803 | 22.84 |  | 8,595 | 22.86 |  | 3,877 | 19.24 |  | 2,327 | 14.53 |
| **Pre-pregnancy maternal body mass index (kg/m2)a** | | | | |  |  |  |  |  |  |  |
| < 18.5 | 1,215 | 15.39 |  | 5,857 | 15.58 |  | 3,371 | 16.73 |  | 2,712 | 16.93 |
| 18.5–< 25 | 5,869 | 74.34 |  | 27,860 | 74.09 |  | 14,742 | 73.16 |  | 11,664 | 72.83 |
| ≥ 25 | 809 | 10.25 |  | 3,873 | 10.30 |  | 2,025 | 10.05 |  | 1,625 | 10.15 |
| Missing value | 2 | 0.03 |  | 14 | 0.04 |  | 11 | 0.05 |  | 14 | 0.09 |
| **Marital statusa** |  |  |  |  |  |  |  |  |  |  |  |
| Married | 7,578 | 95.98 |  | 36,091 | 95.98 |  | 19,169 | 95.14 |  | 14,816 | 92.51 |
| Non-married | 265 | 3.36 |  | 1,270 | 3.38 |  | 831 | 4.12 |  | 1,027 | 6.41 |
| Missing value | 52 | 0.66 |  | 243 | 0.65 |  | 149 | 0.74 |  | 172 | 1.07 |
| **Education status (years)b** |  |  |  |  |  |  |  |  |  |  |  |
| ≤ 12 (ie, high school graduate) | 2,668 | 33.79 |  | 12,380 | 32.92 |  | 6,925 | 34.37 |  | 6,285 | 39.24 |
| > 12–< 16 | 3,472 | 43.98 |  | 16,409 | 43.64 |  | 8,441 | 41.89 |  | 6,493 | 40.54 |
| ≥ 16 (ie, undergraduate or graduate) | 1,730 | 21.91 |  | 8,715 | 23.18 |  | 4,733 | 23.49 |  | 3,186 | 19.89 |
| Missing value | 25 | 0.32 |  | 100 | 0.27 |  | 50 | 0.25 |  | 51 | 0.32 |
| **Employment statusb** |  |  |  |  |  |  |  |  |  |  |  |
| Employed | 3,987 | 50.50 |  | 20,086 | 53.41 |  | 11,265 | 55.91 |  | 8,960 | 55.95 |
| Unemployed | 3,858 | 48.87 |  | 17,296 | 46.00 |  | 8,733 | 43.34 |  | 6,922 | 43.22 |
| Missing value | 50 | 0.63 |  | 222 | 0.59 |  | 151 | 0.75 |  | 133 | 0.83 |
| **Household income level (million JPY/year)b** | | | | |  |  |  |  |  |  |  |
| < 4 | 2,814 | 35.64 |  | 13,140 | 34.94 |  | 7,499 | 37.22 |  | 6,584 | 41.11 |
| 4–< 6 | 2,454 | 31.08 |  | 12,158 | 32.33 |  | 6,188 | 30.71 |  | 4,758 | 29.71 |
| ≥ 6 | 2,026 | 25.66 |  | 9,933 | 26.41 |  | 5,288 | 26.24 |  | 3,744 | 23.38 |
| Missing value | 601 | 7.61 |  | 2,373 | 6.31 |  | 1,174 | 5.83 |  | 929 | 5.80 |
| **Smoking statusb** |  |  |  |  |  |  |  |  |  |  |  |
| Yes | 245 | 3.10 |  | 1,262 | 3.36 |  | 792 | 3.93 |  | 907 | 5.66 |
| No | 7,587 | 96.10 |  | 36,089 | 95.97 |  | 19,228 | 95.43 |  | 14,978 | 93.52 |
| Missing value | 63 | 0.80 |  | 253 | 0.67 |  | 129 | 0.64 |  | 130 | 0.81 |
| **Drinking statusb** |  |  |  |  |  |  |  |  |  |  |  |
| Yes | 258 | 3.27 |  | 1,095 | 2.91 |  | 478 | 2.37 |  | 401 | 2.50 |
| No | 7,588 | 96.11 |  | 36,240 | 96.37 |  | 19,526 | 96.91 |  | 15,493 | 96.74 |
| Missing value | 49 | 0.62 |  | 269 | 0.72 |  | 145 | 0.72 |  | 121 | 0.76 |
| **Recent experience of stressful life eventsb** | | | |  |  |  |  |  |  |  |  |
| Yes | 3,083 | 39.05 |  | 15,986 | 42.51 |  | 8,818 | 43.76 |  | 7,386 | 46.12 |
| No | 4,758 | 60.27 |  | 21,386 | 56.87 |  | 11,179 | 55.48 |  | 8,545 | 53.36 |
| Missing value | 54 | 0.68 |  | 232 | 0.62 |  | 152 | 0.75 |  | 84 | 0.52 |
| **Experience of verbal abuse and/or domestic violence from partnerb** | | | | | | | |  |  |  |  |
| Yes | 835 | 10.58 |  | 4,521 | 12.02 |  | 2,911 | 14.45 |  | 2,633 | 16.44 |
| No | 7,030 | 89.04 |  | 32,957 | 87.64 |  | 17,169 | 85.21 |  | 13,308 | 83.10 |
| Missing value | 30 | 0.38 |  | 126 | 0.34 |  | 69 | 0.34 |  | 74 | 0.46 |
| **Physician-diagnosed history of major psychiatric diseasesa** | | | | | | | |  |  |  |  |
| Yes | 328 | 4.15 |  | 1,681 | 4.47 |  | 1,056 | 5.24 |  | 1,029 | 6.43 |
| No | 7,541 | 95.52 |  | 35,795 | 95.19 |  | 19,023 | 94.41 |  | 14,902 | 93.05 |
| Missing value | 26 | 0.33 |  | 128 | 0.34 |  | 70 | 0.35 |  | 84 | 0.52 |
| **Physician-diagnosed history of any physical diseasesa** | | | | | |  |  |  |  |  |  |
| Yes | 6,330 | 80.18 |  | 31,129 | 82.78 |  | 16,829 | 83.52 |  | 13,206 | 82.46 |
| No | 1,539 | 19.49 |  | 6,347 | 16.88 |  | 3,250 | 16.13 |  | 2,725 | 17.02 |
| Missing value | 26 | 0.33 |  | 128 | 0.34 |  | 70 | 0.35 |  | 84 | 0.52 |
| **Paritya** |  |  |  |  |  |  |  |  |  |  |  |
| Primiparous | 2,246 | 28.45 |  | 13,276 | 35.30 |  | 9,508 | 47.19 |  | 9,277 | 57.93 |
| Multiparous | 5,539 | 70.16 |  | 23,532 | 62.58 |  | 10,083 | 50.04 |  | 6,157 | 38.45 |
| Missing value | 110 | 1.39 |  | 796 | 2.12 |  | 558 | 2.77 |  | 581 | 3.63 |
| **Negative attitude toward pregnancya** | | |  |  |  |  |  |  |  |  |  |
| Yes | 532 | 6.74 |  | 2,563 | 6.82 |  | 1,406 | 6.98 |  | 1,279 | 7.99 |
| No | 7,306 | 92.54 |  | 34,794 | 92.53 |  | 18,594 | 92.28 |  | 14,594 | 91.13 |
| Missing value | 57 | 0.72 |  | 247 | 0.66 |  | 149 | 0.74 |  | 142 | 0.89 |
| **Maternal psychological distress (K6 score ≥ 13)a** | | | | |  |  |  |  |  |  |  |
| Yes | 185 | 2.34 |  | 938 | 2.49 |  | 688 | 3.41 |  | 874 | 5.46 |
| No | 7,667 | 97.11 |  | 36,459 | 96.96 |  | 19,345 | 96.01 |  | 15,006 | 93.70 |
| Missing value | 43 | 0.54 |  | 207 | 0.55 |  | 116 | 0.58 |  | 135 | 0.84 |
| **Living with partnera** |  |  |  |  |  |  |  |  |  |  |  |
| Yes | 7,295 | 92.40 |  | 34,955 | 92.96 |  | 18,771 | 93.16 |  | 14,584 | 91.06 |
| No | 574 | 7.27 |  | 2,521 | 6.70 |  | 1,308 | 6.49 |  | 1,347 | 8.41 |
| Missing value | 26 | 0.33 |  | 128 | 0.34 |  | 70 | 0.35 |  | 84 | 0.52 |
| **Living with parent(s)a** |  |  |  |  |  |  |  |  |  |  |  |
| Yes | 1,181 | 14.96 |  | 4,282 | 11.39 |  | 1,727 | 8.57 |  | 1,209 | 7.55 |
| No | 6,688 | 84.71 |  | 33,194 | 88.27 |  | 18,352 | 91.08 |  | 14,722 | 91.93 |
| Missing value | 26 | 0.33 |  | 128 | 0.34 |  | 70 | 0.35 |  | 84 | 0.52 |
| **Living with parent(s)-in-lawa** | |  |  |  |  |  |  |  |  |  |  |
| Yes | 1,509 | 19.11 |  | 5,473 | 14.55 |  | 1,690 | 8.39 |  | 820 | 5.12 |
| No | 6,360 | 80.56 |  | 32,003 | 85.11 |  | 18,389 | 91.27 |  | 15,111 | 94.36 |
| Missing value | 26 | 0.33 |  | 128 | 0.34 |  | 70 | 0.35 |  | 84 | 0.52 |
| **Pet ownershipb** |  |  |  |  |  |  |  |  |  |  |  |
| None | 6,118 | 77.49 |  | 30,104 | 80.06 |  | 16,932 | 84.03 |  | 13,634 | 85.13 |
| Dog(s) only | 1,091 | 13.82 |  | 4,723 | 12.56 |  | 1,994 | 9.90 |  | 1,445 | 9.02 |
| Cat(s) only | 470 | 5.95 |  | 2,052 | 5.46 |  | 940 | 4.67 |  | 764 | 4.77 |
| Both dog(s) and cat(s) | 216 | 2.74 |  | 725 | 1.93 |  | 283 | 1.40 |  | 172 | 1.07 |
| **Area of residencea** |  |  |  |  |  |  |  |  |  |  |  |
| A | 477 | 6.04 |  | 2,687 | 7.15 |  | 1,747 | 8.67 |  | 1,620 | 10.12 |
| B | 844 | 10.69 |  | 3,596 | 9.56 |  | 1,485 | 7.37 |  | 1,046 | 6.53 |
| C | 1,039 | 13.16 |  | 5,004 | 13.31 |  | 2,642 | 13.11 |  | 2,128 | 13.29 |
| D | 523 | 6.62 |  | 2,154 | 5.73 |  | 1,144 | 5.68 |  | 818 | 5.11 |
| E | 525 | 6.65 |  | 2,505 | 6.66 |  | 1,388 | 6.89 |  | 945 | 5.90 |
| F | 638 | 8.08 |  | 2,932 | 7.80 |  | 1,276 | 6.33 |  | 961 | 6.00 |
| G | 397 | 5.03 |  | 2,185 | 5.81 |  | 1,152 | 5.72 |  | 863 | 5.39 |
| H | 295 | 3.74 |  | 1,949 | 5.18 |  | 1,227 | 6.09 |  | 951 | 5.94 |
| I | 370 | 4.69 |  | 1,639 | 4.36 |  | 694 | 3.44 |  | 488 | 3.05 |
| J | 617 | 7.82 |  | 2,769 | 7.36 |  | 1,640 | 8.14 |  | 1,354 | 8.45 |
| K | 308 | 3.90 |  | 1,647 | 4.38 |  | 1,150 | 5.71 |  | 1,046 | 6.53 |
| L | 215 | 2.72 |  | 1,140 | 3.03 |  | 589 | 2.92 |  | 513 | 3.20 |
| M | 507 | 6.42 |  | 2,500 | 6.65 |  | 1,374 | 6.82 |  | 1,159 | 7.24 |
| N | 523 | 6.62 |  | 2,566 | 6.82 |  | 1,605 | 7.97 |  | 1,480 | 9.24 |
| O | 617 | 7.82 |  | 2,331 | 6.20 |  | 1,036 | 5.14 |  | 643 | 4.01 |

**Notes:** aMeasured during early pregnancy (mean ± S.D., 16.7 ± 7.6 weeks of gestation)

bMeasured during mid-late pregnancy (mean ± S.D., 28.2 ± 6.4 weeks of gestation)

**Abbreviations:** K6: Kessler Psychological Distress Scale; JPY, Japanese Yen

**Supplementary Table 4** Descriptive characteristics according to generalized trust (n = 81,663)

|  | Generalized trust | | | |  |  |  |  |  |  |  |
| --- | --- | --- | --- | --- | --- | --- | --- | --- | --- | --- | --- |
|  | High |  |  | Relatively high | |  | Relatively low | |  | Low |  |
| Variables | N | % |  | N | % |  | N | % |  | N | % |
| **Maternal age (years old)b** |  |  |  |  |  |  |  |  |  |  |  |
| ≤ 25 | 1,049 | 10.05 |  | 2,743 | 10.09 |  | 3,897 | 14.17 |  | 1,868 | 16.81 |
| > 25–≤ 35 | 6,991 | 66.96 |  | 18,355 | 67.50 |  | 18,125 | 65.90 |  | 7,364 | 66.28 |
| > 35 | 2,400 | 22.99 |  | 6,096 | 22.42 |  | 5,481 | 19.93 |  | 1,879 | 16.91 |
| **Pre-pregnancy maternal body mass index (kg/m2)a** | | | | |  |  |  |  |  |  |  |
| < 18.5 | 1,602 | 15.34 |  | 4,322 | 15.89 |  | 4,411 | 16.04 |  | 1,851 | 16.66 |
| 18.5–< 25 | 7,885 | 75.53 |  | 20,226 | 74.38 |  | 20,176 | 73.36 |  | 8,028 | 72.25 |
| ≥ 25 | 952 | 9.12 |  | 2,635 | 9.69 |  | 2,904 | 10.56 |  | 1,226 | 11.03 |
| Missing value | 1 | 0.01 |  | 11 | 0.04 |  | 12 | 0.04 |  | 6 | 0.05 |
| **Marital statusa** |  |  |  |  |  |  |  |  |  |  |  |
| Married | 10,104 | 96.78 |  | 26,236 | 96.48 |  | 26,030 | 94.64 |  | 10,390 | 93.51 |
| Non-married | 288 | 2.76 |  | 802 | 2.95 |  | 1,243 | 4.52 |  | 610 | 5.49 |
| Missing value | 48 | 0.46 |  | 156 | 0.57 |  | 230 | 0.84 |  | 111 | 1.00 |
| **Education status (years)b** |  |  |  |  |  |  |  |  |  |  |  |
| ≤ 12 (ie, high school graduate) | 2,734 | 26.19 |  | 7,621 | 28.02 |  | 10,625 | 38.63 |  | 4,510 | 40.59 |
| > 12–< 16 | 4,742 | 45.42 |  | 12,079 | 44.42 |  | 11,730 | 42.65 |  | 4,394 | 39.55 |
| ≥ 16 (ie, undergraduate or graduate) | 2,940 | 28.16 |  | 7,435 | 27.34 |  | 5,058 | 18.39 |  | 2,172 | 19.55 |
| Missing value | 24 | 0.23 |  | 59 | 0.22 |  | 90 | 0.33 |  | 35 | 0.32 |
| **Employment statusb** |  |  |  |  |  |  |  |  |  |  |  |
| Employed | 6,019 | 57.65 |  | 15,507 | 57.02 |  | 14,628 | 53.19 |  | 5,666 | 50.99 |
| Unemployed | 4,362 | 41.78 |  | 11,537 | 42.42 |  | 12,658 | 46.02 |  | 5,371 | 48.34 |
| Missing value | 59 | 0.57 |  | 150 | 0.55 |  | 217 | 0.79 |  | 74 | 0.67 |
| **Household income level (million JPY/year)b** | | | | |  |  |  |  |  |  |  |
| < 4 | 3,444 | 32.99 |  | 8,909 | 32.76 |  | 10,696 | 38.89 |  | 4,491 | 40.42 |
| 4–< 6 | 3,344 | 32.03 |  | 8,937 | 32.86 |  | 8,476 | 30.82 |  | 3,350 | 30.15 |
| ≥ 6 | 3,142 | 30.10 |  | 8,016 | 29.48 |  | 6,325 | 23.00 |  | 2,534 | 22.81 |
| Missing value | 510 | 4.89 |  | 1,332 | 4.90 |  | 2,006 | 7.29 |  | 736 | 6.62 |
| **Smoking statusb** |  |  |  |  |  |  |  |  |  |  |  |
| Yes | 210 | 2.01 |  | 665 | 2.45 |  | 1,258 | 4.57 |  | 616 | 5.54 |
| No | 10,175 | 97.46 |  | 26,391 | 97.05 |  | 26,013 | 94.58 |  | 10,403 | 93.63 |
| Missing value | 55 | 0.53 |  | 138 | 0.51 |  | 232 | 0.84 |  | 92 | 0.83 |
| **Drinking statusb** |  |  |  |  |  |  |  |  |  |  |  |
| Yes | 267 | 2.56 |  | 720 | 2.65 |  | 729 | 2.65 |  | 335 | 3.02 |
| No | 10,100 | 96.74 |  | 26,281 | 96.64 |  | 26,574 | 96.62 |  | 10,707 | 96.36 |
| Missing value | 73 | 0.70 |  | 193 | 0.71 |  | 200 | 0.73 |  | 69 | 0.62 |
| **Recent experience of stressful life eventsb** | | | |  |  |  |  |  |  |  |  |
| Yes | 3,932 | 37.66 |  | 11,181 | 41.12 |  | 11,913 | 43.32 |  | 5,345 | 48.11 |
| No | 6,438 | 61.67 |  | 15,872 | 58.37 |  | 15,393 | 55.97 |  | 5,703 | 51.33 |
| Missing value | 70 | 0.67 |  | 141 | 0.52 |  | 197 | 0.72 |  | 63 | 0.57 |
| **Experience of verbal abuse and/or domestic violence from partnerb** | | | | | | | |  |  |  |  |
| Yes | 973 | 9.32 |  | 3,084 | 11.34 |  | 3,795 | 13.80 |  | 1,879 | 16.91 |
| No | 9,431 | 90.34 |  | 24,021 | 88.33 |  | 23,615 | 85.86 |  | 9,192 | 82.73 |
| Missing value | 36 | 0.34 |  | 89 | 0.33 |  | 93 | 0.34 |  | 40 | 0.36 |
| **Physician-diagnosed history of major psychiatric diseasesa** | | | | | | | |  |  |  |  |
| Yes | 346 | 3.31 |  | 1,102 | 4.05 |  | 1,354 | 4.92 |  | 718 | 6.46 |
| No | 10,065 | 96.41 |  | 26,002 | 95.62 |  | 26,040 | 94.68 |  | 10,343 | 93.09 |
| Missing value | 29 | 0.28 |  | 90 | 0.33 |  | 109 | 0.40 |  | 50 | 0.45 |
| **Physician-diagnosed history of any physical diseasesa** | | | | | |  |  |  |  |  |  |
| Yes | 8,522 | 81.63 |  | 22,657 | 83.32 |  | 22,499 | 81.81 |  | 9,324 | 83.92 |
| No | 1,889 | 18.09 |  | 4,447 | 16.35 |  | 4,895 | 17.80 |  | 1,737 | 15.63 |
| Missing value | 29 | 0.28 |  | 90 | 0.33 |  | 109 | 0.40 |  | 50 | 0.45 |
| **Paritya** |  |  |  |  |  |  |  |  |  |  |  |
| Primiparous | 4,104 | 39.31 |  | 11,152 | 41.01 |  | 11,446 | 41.62 |  | 5,112 | 46.01 |
| Multiparous | 6,083 | 58.27 |  | 15,363 | 56.49 |  | 15,389 | 55.95 |  | 5,695 | 51.26 |
| Missing value | 253 | 2.42 |  | 679 | 2.50 |  | 668 | 2.43 |  | 304 | 2.74 |
| **Negative attitude toward pregnancya** | | |  |  |  |  |  |  |  |  |  |
| Yes | 619 | 5.93 |  | 1,641 | 6.03 |  | 2,022 | 7.35 |  | 936 | 8.42 |
| No | 9,754 | 93.43 |  | 25,378 | 93.32 |  | 25,268 | 91.87 |  | 10,087 | 90.78 |
| Missing value | 67 | 0.64 |  | 175 | 0.64 |  | 213 | 0.77 |  | 88 | 0.79 |
| **Maternal psychological distress (K6 score ≥ 13)a** | | | | |  |  |  |  |  |  |  |
| Yes | 177 | 1.70 |  | 511 | 1.88 |  | 916 | 3.33 |  | 539 | 4.85 |
| No | 10,211 | 97.81 |  | 26,549 | 97.63 |  | 26,402 | 96.00 |  | 10,489 | 94.40 |
| Missing value | 52 | 0.50 |  | 134 | 0.49 |  | 185 | 0.67 |  | 83 | 0.75 |
| **Living with partnera** |  |  |  |  |  |  |  |  |  |  |  |
| Yes | 9,805 | 93.92 |  | 25,554 | 93.97 |  | 25,326 | 92.08 |  | 10,147 | 91.32 |
| No | 606 | 5.80 |  | 1,550 | 5.70 |  | 2,068 | 7.52 |  | 914 | 8.23 |
| Missing value | 29 | 0.28 |  | 90 | 0.33 |  | 109 | 0.40 |  | 50 | 0.45 |
| **Living with parent(s)a** |  |  |  |  |  |  |  |  |  |  |  |
| Yes | 979 | 9.38 |  | 2,558 | 9.41 |  | 2,900 | 10.54 |  | 1,269 | 11.42 |
| No | 9,432 | 90.34 |  | 24,546 | 90.26 |  | 24,494 | 89.06 |  | 9,792 | 88.13 |
| Missing value | 29 | 0.28 |  | 90 | 0.33 |  | 109 | 0.40 |  | 50 | 0.45 |
| **Living with parent(s)-in-lawa** | |  |  |  |  |  |  |  |  |  |  |
| Yes | 1,430 | 13.70 |  | 3,243 | 11.93 |  | 3,119 | 11.34 |  | 1,176 | 10.58 |
| No | 8,981 | 86.02 |  | 23,861 | 87.74 |  | 24,275 | 88.26 |  | 9,885 | 88.97 |
| Missing value | 29 | 0.28 |  | 90 | 0.33 |  | 109 | 0.40 |  | 50 | 0.45 |
| **Pet ownershipb** |  |  |  |  |  |  |  |  |  |  |  |
| None | 8,653 | 82.88 |  | 22,623 | 83.19 |  | 22,376 | 81.36 |  | 8,941 | 80.47 |
| Dog(s) only | 1,107 | 10.60 |  | 2,861 | 10.52 |  | 3,246 | 11.80 |  | 1,308 | 11.77 |
| Cat(s) only | 487 | 4.66 |  | 1,302 | 4.79 |  | 1,416 | 5.15 |  | 664 | 5.98 |
| Both dog(s) and cat(s) | 193 | 1.85 |  | 408 | 1.50 |  | 465 | 1.69 |  | 198 | 1.78 |
| **Area of residencea** |  |  |  |  |  |  |  |  |  |  |  |
| A | 715 | 6.85 |  | 2,110 | 7.76 |  | 2,201 | 8.00 |  | 989 | 8.90 |
| B | 804 | 7.70 |  | 2,216 | 8.15 |  | 2,485 | 9.04 |  | 1,053 | 9.48 |
| C | 1,382 | 13.24 |  | 3,714 | 13.66 |  | 3,638 | 13.23 |  | 1,351 | 12.16 |
| D | 576 | 5.52 |  | 1,566 | 5.76 |  | 1,512 | 5.50 |  | 657 | 5.91 |
| E | 613 | 5.87 |  | 1,809 | 6.65 |  | 1,818 | 6.61 |  | 777 | 6.99 |
| F | 821 | 7.86 |  | 2,062 | 7.58 |  | 1,855 | 6.74 |  | 732 | 6.59 |
| G | 685 | 6.56 |  | 1,690 | 6.21 |  | 1,478 | 5.37 |  | 544 | 4.90 |
| H | 491 | 4.70 |  | 1,487 | 5.47 |  | 1,456 | 5.29 |  | 689 | 6.20 |
| I | 486 | 4.66 |  | 1,212 | 4.46 |  | 962 | 3.50 |  | 396 | 3.56 |
| J | 783 | 7.50 |  | 1,891 | 6.95 |  | 2,316 | 8.42 |  | 886 | 7.97 |
| K | 462 | 4.43 |  | 1,312 | 4.82 |  | 1,442 | 5.24 |  | 599 | 5.39 |
| L | 336 | 3.22 |  | 833 | 3.06 |  | 832 | 3.03 |  | 279 | 2.51 |
| M | 829 | 7.94 |  | 1,832 | 6.74 |  | 1,816 | 6.60 |  | 703 | 6.33 |
| N | 734 | 7.03 |  | 1,933 | 7.11 |  | 2,161 | 7.86 |  | 885 | 7.97 |
| O | 723 | 6.93 |  | 1,527 | 5.62 |  | 1,531 | 5.57 |  | 571 | 5.14 |

**Notes:** aMeasured during early pregnancy (mean ± S.D., 16.7 ± 7.6 weeks of gestation)

bMeasured during mid-late pregnancy (mean ± S.D., 28.2 ± 6.4 weeks of gestation)

**Abbreviations:** K6: Kessler Psychological Distress Scale; JPY, Japanese Yen

**Supplementary Table 5** Descriptive characteristics according to generalized reciprocity (n = 81,663)

|  | Generalized reciprocity | | | |  |  |  |  |  |  |  |
| --- | --- | --- | --- | --- | --- | --- | --- | --- | --- | --- | --- |
|  | High |  |  | Relatively high | |  | Relatively low | |  | Low |  |
| Variables | N | % |  | N | % |  | N | % |  | N | % |
| **Maternal age (years old)b** |  |  |  |  |  |  |  |  |  |  |  |
| ≤ 25 | 595 | 10.78 |  | 2,189 | 9.74 |  | 4,890 | 13.48 |  | 2,161 | 16.46 |
| > 25–≤ 35 | 3,705 | 67.12 |  | 15,136 | 67.34 |  | 24,137 | 66.54 |  | 8,629 | 65.72 |
| > 35 | 1,220 | 22.10 |  | 5,152 | 22.92 |  | 7,246 | 19.98 |  | 2,339 | 17.82 |
| **Pre-pregnancy maternal body mass index (kg/m2)a** | | | | |  |  |  |  |  |  |  |
| < 18.5 | 851 | 15.42 |  | 3,570 | 15.88 |  | 5,911 | 16.30 |  | 2,105 | 16.03 |
| 18.5–< 25 | 4,165 | 75.45 |  | 16,836 | 74.90 |  | 26,530 | 73.14 |  | 9,584 | 73.00 |
| ≥ 25 | 504 | 9.13 |  | 2,061 | 9.17 |  | 3,813 | 10.51 |  | 1,436 | 10.94 |
| Missing value | 0 | 0.00 |  | 10 | 0.04 |  | 19 | 0.05 |  | 4 | 0.03 |
| **Marital statusa** |  |  |  |  |  |  |  |  |  |  |  |
| Married | 5,340 | 96.74 |  | 21,709 | 96.58 |  | 34,425 | 94.91 |  | 12,334 | 93.94 |
| Non-married | 153 | 2.77 |  | 618 | 2.75 |  | 1,581 | 4.36 |  | 670 | 5.10 |
| Missing value | 27 | 0.49 |  | 150 | 0.67 |  | 267 | 0.74 |  | 125 | 0.95 |
| **Education status (years)b** |  |  |  |  |  |  |  |  |  |  |  |
| ≤ 12 (ie, high school graduate) | 1,492 | 27.03 |  | 6,054 | 26.93 |  | 13,313 | 36.70 |  | 5,168 | 39.36 |
| > 12–< 16 | 2,528 | 45.80 |  | 9,919 | 44.13 |  | 15,611 | 43.04 |  | 5,296 | 40.34 |
| ≥ 16 (ie, undergraduate or graduate) | 1,488 | 26.96 |  | 6,449 | 28.69 |  | 7,241 | 19.96 |  | 2,630 | 20.03 |
| Missing value | 12 | 0.22 |  | 55 | 0.24 |  | 108 | 0.30 |  | 35 | 0.27 |
| **Employment statusb** |  |  |  |  |  |  |  |  |  |  |  |
| Employed | 3,097 | 56.11 |  | 12,859 | 57.21 |  | 19,212 | 52.97 |  | 7,084 | 53.96 |
| Unemployed | 2,386 | 43.22 |  | 9,495 | 42.24 |  | 16,790 | 46.29 |  | 5,962 | 45.41 |
| Missing value | 37 | 0.67 |  | 123 | 0.55 |  | 271 | 0.75 |  | 83 | 0.63 |
| **Household income level (million JPY/year)b** | | | | |  |  |  |  |  |  |  |
| < 4 | 1,916 | 34.71 |  | 7,099 | 31.58 |  | 13,743 | 37.89 |  | 5,214 | 39.71 |
| 4–< 6 | 1,786 | 32.36 |  | 7,380 | 32.83 |  | 11,313 | 31.19 |  | 3,975 | 30.28 |
| ≥ 6 | 1,552 | 28.12 |  | 6,873 | 30.58 |  | 8,667 | 23.89 |  | 3,138 | 23.90 |
| Missing value | 266 | 4.82 |  | 1,125 | 5.01 |  | 2,550 | 7.03 |  | 802 | 6.11 |
| **Smoking statusb** |  |  |  |  |  |  |  |  |  |  |  |
| Yes | 124 | 2.25 |  | 491 | 2.18 |  | 1,512 | 4.17 |  | 682 | 5.19 |
| No | 5,360 | 97.10 |  | 21,880 | 97.34 |  | 34,472 | 95.03 |  | 12,355 | 94.10 |
| Missing value | 36 | 0.65 |  | 106 | 0.47 |  | 289 | 0.80 |  | 92 | 0.70 |
| **Drinking statusb** |  |  |  |  |  |  |  |  |  |  |  |
| Yes | 146 | 2.64 |  | 562 | 2.50 |  | 927 | 2.56 |  | 456 | 3.47 |
| No | 5,329 | 96.54 |  | 21,749 | 96.76 |  | 35,101 | 96.77 |  | 12,589 | 95.89 |
| Missing value | 45 | 0.82 |  | 166 | 0.74 |  | 245 | 0.68 |  | 84 | 0.64 |
| **Recent experience of stressful life eventsb** | | | |  |  |  |  |  |  |  |  |
| Yes | 1,968 | 35.65 |  | 9,101 | 40.49 |  | 15,391 | 42.43 |  | 6,420 | 48.90 |
| No | 3,509 | 63.57 |  | 13,262 | 59.00 |  | 20,634 | 56.89 |  | 6,627 | 50.48 |
| Missing value | 43 | 0.78 |  | 114 | 0.51 |  | 248 | 0.68 |  | 82 | 0.62 |
| **Experience of verbal abuse and/or domestic violence from partnerb** | | | | | | | |  |  |  |  |
| Yes | 493 | 8.93 |  | 2,442 | 10.86 |  | 4,765 | 13.14 |  | 2,180 | 16.60 |
| No | 5,007 | 90.71 |  | 19,962 | 88.81 |  | 31,377 | 86.50 |  | 10,901 | 83.03 |
| Missing value | 20 | 0.36 |  | 73 | 0.32 |  | 131 | 0.36 |  | 48 | 0.37 |
| **Physician-diagnosed history of major psychiatric diseasesa** | | | | | | | |  |  |  |  |
| Yes | 220 | 3.99 |  | 936 | 4.16 |  | 1,693 | 4.67 |  | 813 | 6.19 |
| No | 5,284 | 95.72 |  | 21,451 | 95.44 |  | 34,458 | 95.00 |  | 12,255 | 93.34 |
| Missing value | 16 | 0.29 |  | 90 | 0.40 |  | 122 | 0.34 |  | 61 | 0.46 |
| **Physician-diagnosed history of any physical diseasesa** | | | | | |  |  |  |  |  |  |
| Yes | 4,428 | 80.22 |  | 18,733 | 83.34 |  | 29,728 | 81.96 |  | 11,050 | 84.16 |
| No | 1,076 | 19.49 |  | 3,654 | 16.26 |  | 6,423 | 17.71 |  | 2,018 | 15.37 |
| Missing value | 16 | 0.29 |  | 90 | 0.40 |  | 122 | 0.34 |  | 61 | 0.46 |
| **Paritya** |  |  |  |  |  |  |  |  |  |  |  |
| Primiparous | 2,107 | 38.17 |  | 9,109 | 40.53 |  | 15,027 | 41.43 |  | 6,072 | 46.25 |
| Multiparous | 3,295 | 59.69 |  | 12,789 | 56.90 |  | 20,376 | 56.17 |  | 6,673 | 50.83 |
| Missing value | 118 | 2.14 |  | 579 | 2.58 |  | 870 | 2.40 |  | 384 | 2.92 |
| **Negative attitude toward pregnancya** | | |  |  |  |  |  |  |  |  |  |
| Yes | 306 | 5.54 |  | 1,316 | 5.85 |  | 2,566 | 7.07 |  | 1,145 | 8.72 |
| No | 5,176 | 93.77 |  | 21,008 | 93.46 |  | 33,453 | 92.23 |  | 11,872 | 90.43 |
| Missing value | 38 | 0.69 |  | 153 | 0.68 |  | 254 | 0.70 |  | 112 | 0.85 |
| **Maternal psychological distress (K6 score ≥ 13)a** | | | | |  |  |  |  |  |  |  |
| Yes | 110 | 1.99 |  | 420 | 1.87 |  | 1,117 | 3.08 |  | 596 | 4.54 |
| No | 5,377 | 97.41 |  | 21,934 | 97.58 |  | 34,940 | 96.33 |  | 12,440 | 94.75 |
| Missing value | 33 | 0.60 |  | 123 | 0.55 |  | 216 | 0.60 |  | 93 | 0.71 |
| **Living with partnera** |  |  |  |  |  |  |  |  |  |  |  |
| Yes | 5,175 | 93.75 |  | 21,137 | 94.04 |  | 33,503 | 92.36 |  | 12,032 | 91.64 |
| No | 329 | 5.96 |  | 1,250 | 5.56 |  | 2,648 | 7.30 |  | 1,036 | 7.89 |
| Missing value | 16 | 0.29 |  | 90 | 0.40 |  | 122 | 0.34 |  | 61 | 0.46 |
| **Living with parent(s)a** |  |  |  |  |  |  |  |  |  |  |  |
| Yes | 518 | 9.38 |  | 2,030 | 9.03 |  | 3,810 | 10.50 |  | 1,455 | 11.08 |
| No | 4,986 | 90.33 |  | 20,357 | 90.57 |  | 32,341 | 89.16 |  | 11,613 | 88.45 |
| Missing value | 16 | 0.29 |  | 90 | 0.40 |  | 122 | 0.34 |  | 61 | 0.46 |
| **Living with parent(s)-in-lawa** | |  |  |  |  |  |  |  |  |  |  |
| Yes | 729 | 13.21 |  | 2,725 | 12.12 |  | 4,179 | 11.52 |  | 1,417 | 10.79 |
| No | 4,775 | 86.50 |  | 19,662 | 87.48 |  | 31,972 | 88.14 |  | 11,651 | 88.74 |
| Missing value | 16 | 0.29 |  | 90 | 0.40 |  | 122 | 0.34 |  | 61 | 0.46 |
| **Pet ownershipb** |  |  |  |  |  |  |  |  |  |  |  |
| None | 4,588 | 83.12 |  | 18,759 | 83.46 |  | 29,645 | 81.73 |  | 10,577 | 80.56 |
| Dog(s) only | 587 | 10.63 |  | 2,276 | 10.13 |  | 4,242 | 11.69 |  | 1,517 | 11.55 |
| Cat(s) only | 252 | 4.57 |  | 1,091 | 4.85 |  | 1,760 | 4.85 |  | 808 | 6.15 |
| Both dog(s) and cat(s) | 93 | 1.68 |  | 351 | 1.56 |  | 626 | 1.73 |  | 227 | 1.73 |
| **Area of residencea** |  |  |  |  |  |  |  |  |  |  |  |
| A | 381 | 6.90 |  | 1,739 | 7.74 |  | 2,907 | 8.01 |  | 1,148 | 8.74 |
| B | 437 | 7.92 |  | 1,821 | 8.10 |  | 3,152 | 8.69 |  | 1,203 | 9.16 |
| C | 705 | 12.77 |  | 3,071 | 13.66 |  | 4,777 | 13.17 |  | 1,666 | 12.69 |
| D | 297 | 5.38 |  | 1,260 | 5.61 |  | 1,997 | 5.51 |  | 818 | 6.23 |
| E | 318 | 5.76 |  | 1,486 | 6.61 |  | 2,332 | 6.43 |  | 913 | 6.95 |
| F | 444 | 8.04 |  | 1,684 | 7.49 |  | 2,520 | 6.95 |  | 887 | 6.76 |
| G | 315 | 5.71 |  | 1,373 | 6.11 |  | 2,028 | 5.59 |  | 700 | 5.33 |
| H | 237 | 4.29 |  | 1,232 | 5.48 |  | 1,978 | 5.45 |  | 742 | 5.65 |
| I | 252 | 4.57 |  | 1,015 | 4.52 |  | 1,326 | 3.66 |  | 470 | 3.58 |
| J | 390 | 7.07 |  | 1,558 | 6.93 |  | 2,987 | 8.23 |  | 1,022 | 7.78 |
| K | 243 | 4.40 |  | 1,084 | 4.82 |  | 1,836 | 5.06 |  | 735 | 5.60 |
| L | 182 | 3.30 |  | 708 | 3.15 |  | 1,075 | 2.96 |  | 366 | 2.79 |
| M | 474 | 8.59 |  | 1,517 | 6.75 |  | 2,450 | 6.75 |  | 826 | 6.29 |
| N | 407 | 7.37 |  | 1,646 | 7.32 |  | 2,827 | 7.79 |  | 1,000 | 7.62 |
| O | 438 | 7.93 |  | 1,283 | 5.71 |  | 2,081 | 5.74 |  | 633 | 4.82 |

**Notes:** aMeasured during early pregnancy (mean ± S.D., 16.7 ± 7.6 weeks of gestation)

bMeasured during mid-late pregnancy (mean ± S.D., 28.2 ± 6.4 weeks of gestation)

**Abbreviations:** K6: Kessler Psychological Distress Scale; JPY, Japanese Yen
